# Supplementary material for: Oxide planar p–n heterojunction prepared by low temperature solution growth for UV-photodetector applications
Source: Royal Society of Chemistry journal article supplement (doi:10.1039/c6ra13763f), 2016-01-01
Supplement: c6ra13763f1.pdf [file c6ra13763f1.pdf]

## Supplementary Information

# Oxide Planar *p-n* Heterojunction Prepared by Low Temperature Solution Growth for UV-Photodetector Application

O. Lupan,<sup>\*a,b</sup> S. Koussi-Daoud,<sup>a</sup> B. Viana,<sup>a</sup> T. Pauporté<sup>\*a</sup>

<sup>a</sup> Institut de Recherche de Chimie Paris, UMR8247, PSL Research University, Chimie ParisTech, CNRS, 11 rue P. et M. Curie, 75231, Paris, cedex 05, France.

<sup>b</sup> Department of Microelectronics and Biomedical Engineering, Technical University of Moldova, 168 Stefan cel Mare Blvd., MD-2004, Chisinau, Republic of Moldova

E-mails : [thierry.pauporte@chimie-paristech.fr](mailto:thierry.pauporte@chimie-paristech.fr); [lupanoleg@yahoo.com](mailto:lupanoleg@yahoo.com)

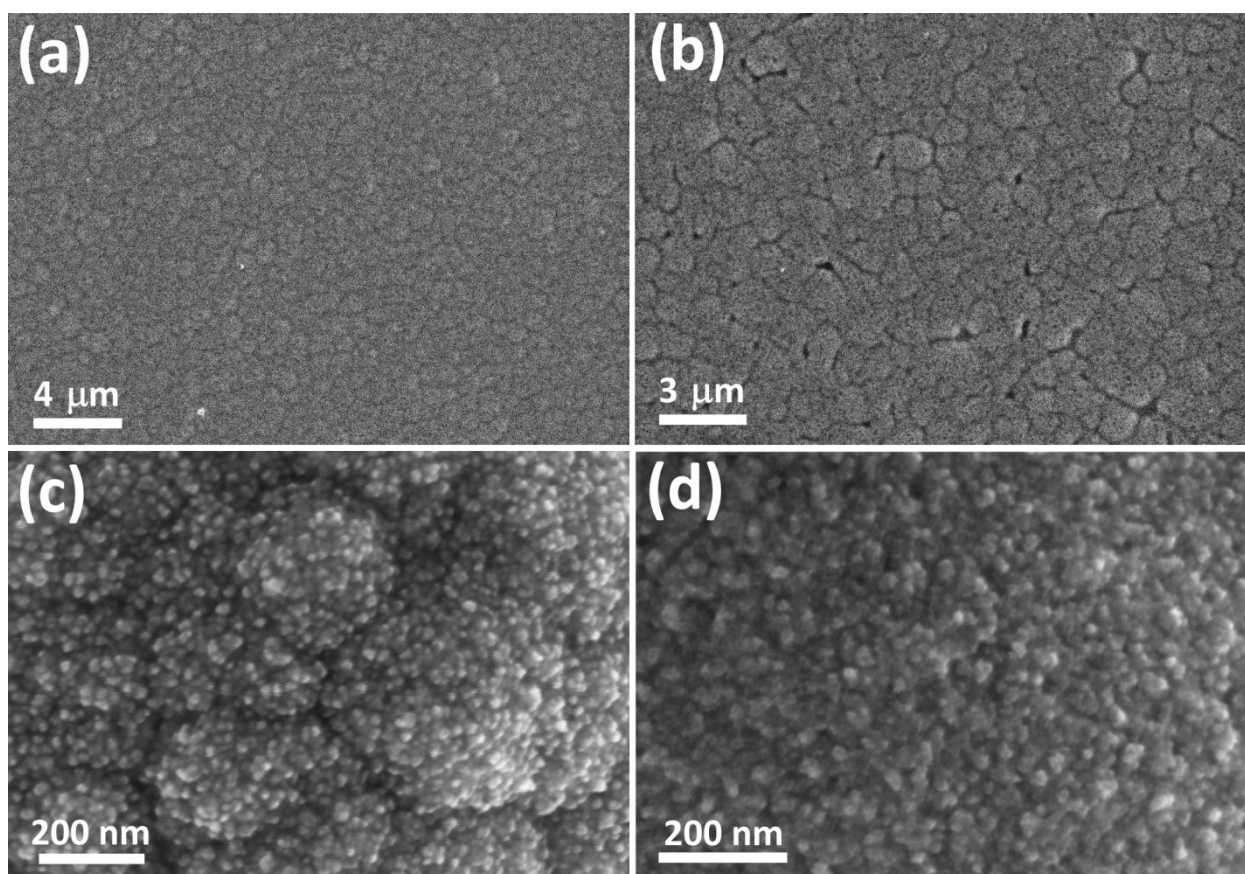

**Figure S1.** SEM top-view images of the NiO deposited layer on ZnO/FTO/glass substrate at different magnifications.

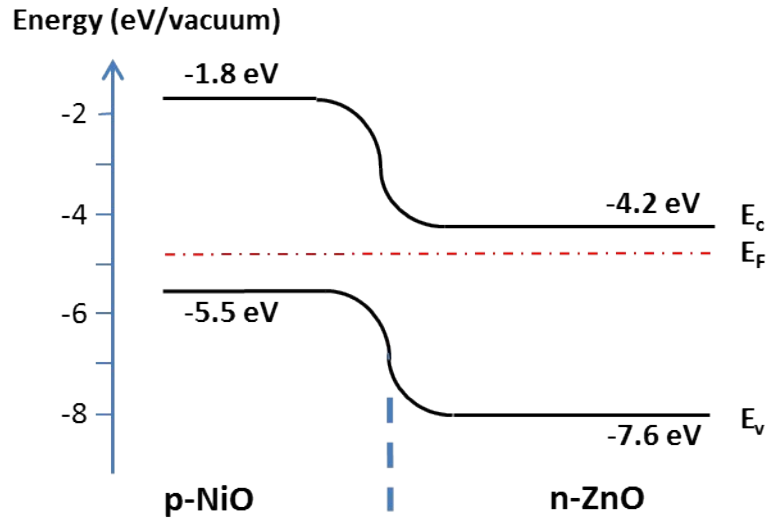

**Figure S2.** Schematic energy band diagram of *p*-NiO/*n*-ZnO heterojunction at equilibrium.

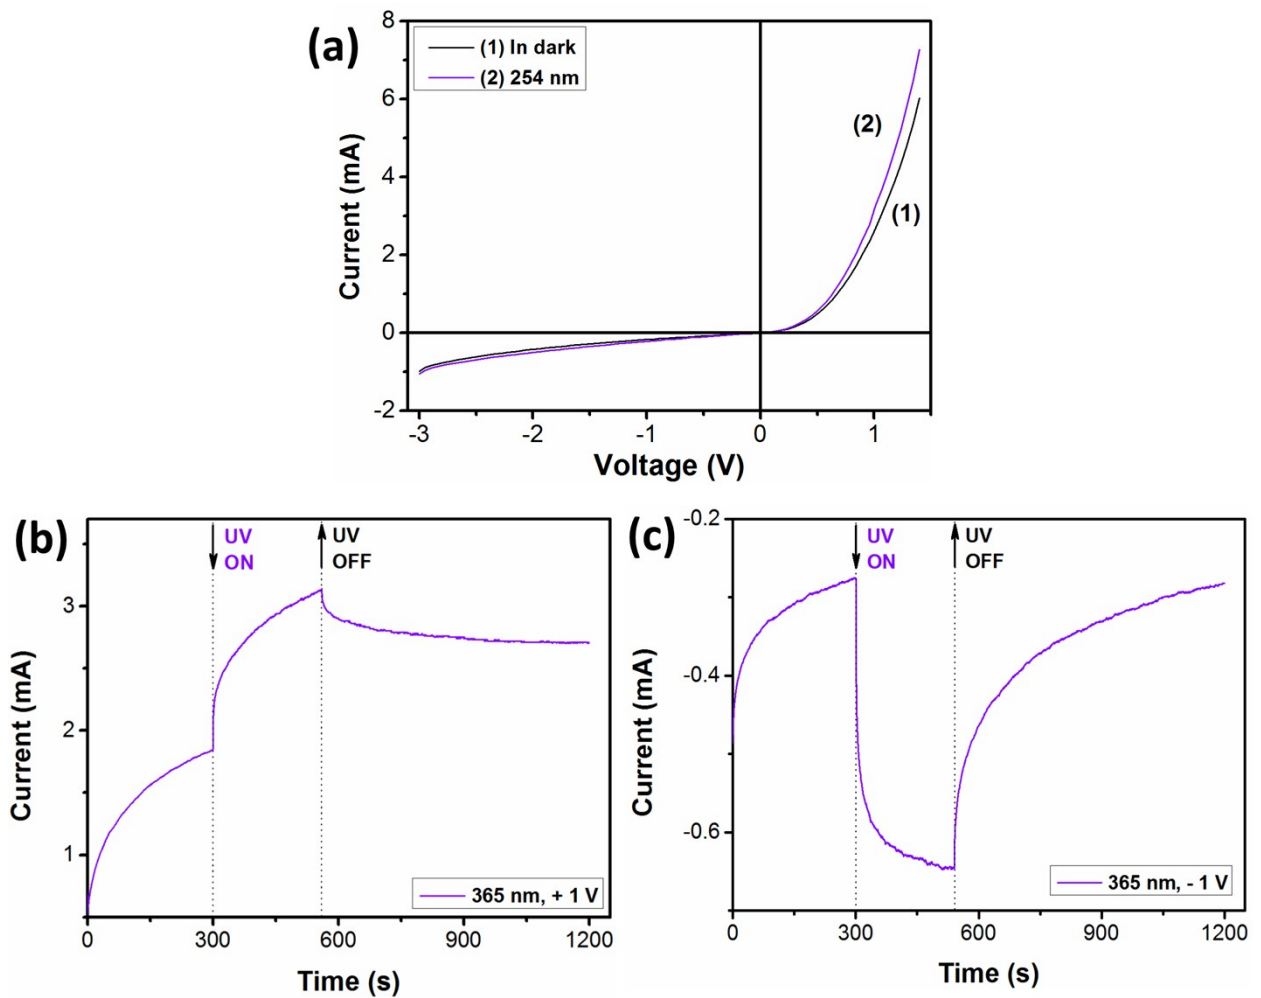

**Figure S3.** (a) Typical current-voltage characteristics of the *p*-NiO/*n*-ZnO heterostructure based device in the dark and under UV illumination ( $\lambda = 254$  nm). (b,c) Transient UV ( $\lambda = 365$  nm) response at lower intensity at (b) +1 V and (c) -1 V applied voltage bias.
